# Supplementary material for: Plasticizer-free and pH-independent ion-selective optode films based on a solvatochromic dye
Source: Royal Society of Chemistry journal article supplement (doi:10.1039/d0ay00439a), 2020-01-01

## Supporting Information

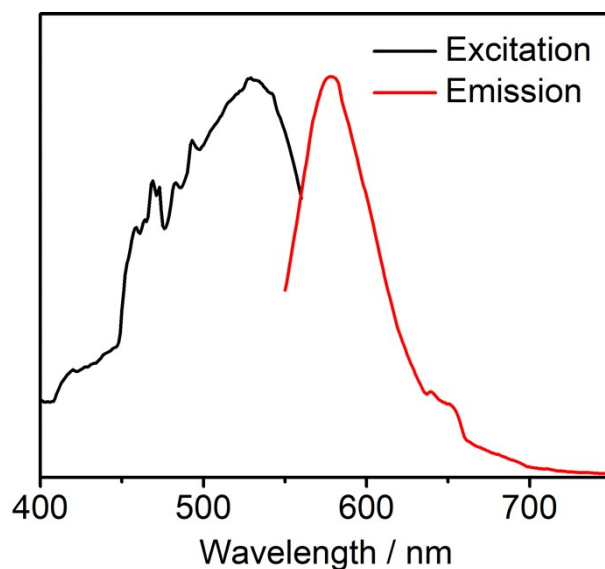

**Fig. S1** Excitation and emission spectra of the SDII-KII-based ion-selective optode on the Nylon membrane.

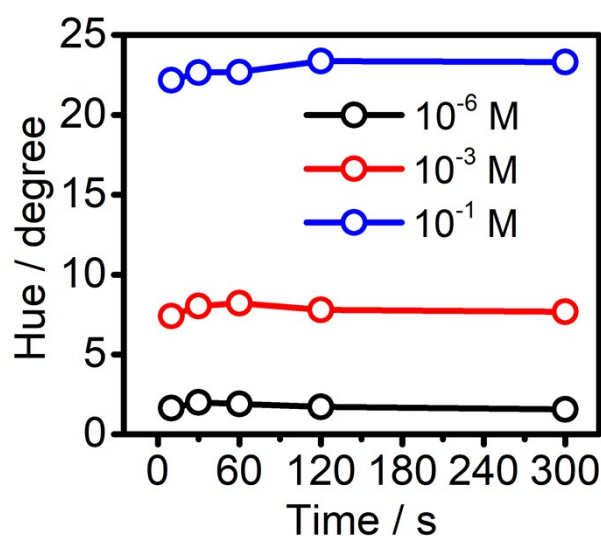

**Fig. S2** Change in hue of the SDII-KII optodes over time after addition of 30  $\mu$ L of aqueous samples onto the optode membrane. Although different optodes may have slightly different initial color due to errors in fabrication, a fast response time of about 30-60s is highly reproducible.

**Synthesis of SD1 and SD2:** All the chemicals were commercially available and used directly. Column chromatography was carried out using silica gel (60 Å, 60 - 230 µm) and ACS grade organic solvents (ethyl acetate, petroleum ether (boiling point range: 30 - 60 °C)). The synthetic compounds were characterized using <sup>1</sup>H NMR spectroscopy (Varian 400 MHz spectrometer). The solvatochromic dyes SDI and SDII were synthesized according to the pathways (1 and 2) in Scheme 1 with an adapted method of the procedure reported.<sup>1</sup>

**Pathway 1**

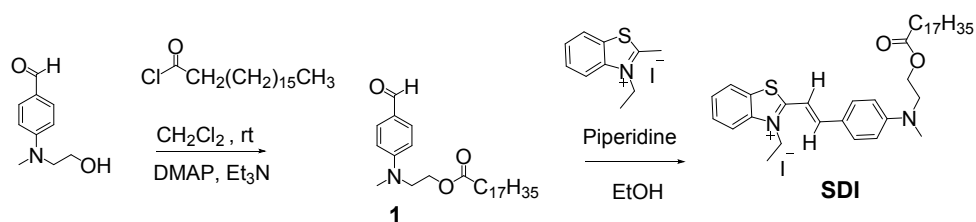

**Pathway 2**

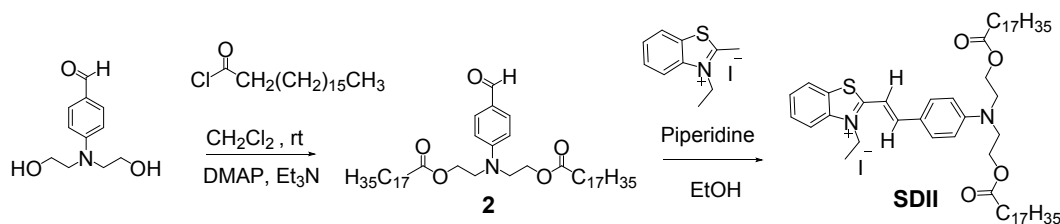

Scheme 1. The synthetic routes for solvatochromic dyes (SDI and SDII).

**2-(4-Formylphenylmethylamino)ethyl stearate 1.** To a solution of 4-((2-hydroxyethyl)methylamino)benzaldehyde (554.0 mg, 3.091 mmol), DMAP (5 mg) and anhydrous  $\text{Et}_3\text{N}$  (431.0 µL,  $d=0.726$  g/mL, 3.092 mmol) completely dissolved in anhydrous  $\text{CH}_2\text{Cl}_2$  (30 mL), was added stearoyl chloride (936.0 mg, 3.090 mmol) in anhydrous  $\text{CH}_2\text{Cl}_2$  (5 mL) by dropwise. After overnight stirring for 16 h, the reaction solution was washed by water ( $3 \times 100$  mL). The organic layer was dried over by  $\text{MgSO}_4$  and taken to dryness. The crude product was purified by column chromatography (silica gel/25:75 ethyl acetate-petroleum ether) to yield the title compound **1** as a yellow solid (1.25 g, 90%). <sup>1</sup>H NMR (400 MHz,  $\text{CDCl}_3$ ):  $\delta$  9.75 (s, 1 H), 7.74 (d,  $J = 9.2$  Hz, 2 H),

6.76 (d,  $J$  = 9.2 Hz, 2 H), 4.28 (t,  $J$  = 6.0 Hz, 2 H), 3.70 (t,  $J$  = 6.0 Hz, 2 H), 3.09 (s, 3 H), 2.24 (t,  $J$  = 7.6 Hz, 2 H), 1.30-1.24 (m, 30 H), 0.88 (t,  $J$  = 6.8 Hz, 3 H).

**(*E*)-3-Ethyl-2-(4-methyl-2-stearoyloxyethylaminostyryl)benzo[d]thiazol-3-ium (SDI).** To a solution of aldehyde **1** (500.0 mg, 1.122 mmol) and 3-ethyl-2-methylbenzothiazolium iodide (330.0 mg, 1.081 mmol) in EtOH (80 mL), was added piperidine (anhydrous, 20  $\mu$ L). The reaction solution was then refluxed over 2 days. After cooled back to room temperature, the solvent was taken to dryness. The resulting crude product was recrystallized in EtOH to yield a brown red solid as the title compound (400 mg, 45%).  $^1\text{H}$  NMR (400 MHz,  $\text{CDCl}_3$ ): 8.07 (d,  $J$  = 8.8 Hz, 2 H), 8.01 (d,  $J$  = 7.6 Hz, 1 H), 7.87 (d,  $J$  = 4.4 Hz, 2 H), 7.75 (d,  $J$  = 8.4 Hz, 1 H), 7.69 (td,  $J$  = 6.8, 0.8 Hz, 1 H), 7.59 (td,  $J$  = 6.8, 0.8 Hz, 1 H), 6.77 (d,  $J$  = 9.2 Hz, 2 H), 5.13 (q,  $J$  = 7.2 Hz, 2 H), 4.28 (t,  $J$  = 6.0 Hz, 2 H), 3.76-3.69 (m, 3 H), 3.11 (s, 3 H), 2.27 (t,  $J$  = 7.6 Hz, 2 H), 1.61 (t,  $J$  = 7.2 Hz, 2 H), 1.26-1.23 (m, 30 H), 0.88 (t,  $J$  = 7.2 Hz, 3 H).

**(4-Formylphenylazanediyl)bisethane-2,1-diyl distearate **2**.** To a stirring solution of 4-[*N,N*-bis(2-hydroxyethyl)amino]benzaldehyde (500.83 mg, 2.3936 mmol) and DMAP (18 mg, 0.15 mmol) dissolved in anhydrous  $\text{CH}_2\text{Cl}_2$  (55 mL), was added anhydrous  $\text{Et}_3\text{N}$  (700  $\mu$ L,  $d=0.726$  g/mL, 5.02 mmol). When aldehyde was completely dissolved, stearoyl chloride (1.520 g, 5.018 mmol) dissolved in anhydrous  $\text{CH}_2\text{Cl}_2$  (5 mL) was slowly added into reaction solution by droplets in one portion. After stirring for 17 h, the reaction mixture was washed by water (3  $\times$  120 mL) and saturated brine (100 mL) again. After the drying over by  $\text{MgSO}_4$ , all organic solvent was concentrated under vacuum to afford a yellow crude powder. This crude product was purified by column chromatography (silica gel/15:85 ethyl acetate-petroleum ether) to obtain the title compound as a yellow powder (1.58 g, 89%).  $^1\text{H}$  NMR (400 MHz,  $\text{CDCl}_3$ ):  $\delta$  9.76 (s, 1 H), 7.74 (d,  $J$  = 8.8 Hz, 2 H), 6.82 (d,  $J$  = 8.8 Hz, 2 H), 4.28 (t,  $J$  = 6.0 Hz, 4 H), 3.71 (t,  $J$  = 6.0 Hz, 4 H), 2.28 (t,  $J$  = 7.6 Hz, 4 H), 1.60-1.51 (m, 4

H), 1.25 (s, 56 H), 0.88 (t,  $J = 6.0$  Hz, 6 H).

**(*E*)-2-(4-(bis(2-(stearoyloxy)ethyl)amino)styryl)-3-ethylbenzo[d]thiazol-3-ium (SDII).**

To a solution of 3-ethyl-2-methylbenzothiazolium iodide (287.84 mg, 0.9432 mmol) and aldehyde **2** (700.0 mg, 0.9432 mmol) in ethanol (anhydrous open in atmosphere, 60 mL) was added piperidine (anhydrous, 15  $\mu$ L). Then the reaction mixture was refluxed for 2 days. After the reaction mixture cooled to room temperature, a brown red precipitate was obtained. This crude product was recrystallized in EtOH to yield a brown red solid as the title compound (210 mg, 22%).  $^1\text{H}$  NMR (400 MHz,  $\text{CDCl}_3$ ):  $\delta$  8.07 (d,  $J = 8.8$  Hz, 2 H), 8.01 (d,  $J = 8.0$  Hz, 1 H), 7.96 (d,  $J = 15.2$  Hz, 1 H), 7.83 (d,  $J = 16.4$  Hz, 1 H), 7.80 (d,  $J = 9.2$  Hz, 1 H), 7.72 (t,  $J = 7.2$  Hz, 1 H), 7.62 (t,  $J = 7.2$  Hz, 1 H), 6.86 (d,  $J = 8.8$  Hz, 2 H), 5.17 (q,  $J = 7.6$  Hz, 2 H), 4.28 (t,  $J = 6.4$  Hz, 4 H), 3.74 (t,  $J = 6.4$  Hz, 4 H), 2.31 (t,  $J = 7.6$  Hz, 4 H), 1.65-1.58 (m, 7 H), 1.24 (s, 56 H), 0.88 (t,  $J = 6.0$  Hz, 6 H).

## Reference

1. X. Xie, I. Szilagyi, J. Zhai, L. Wang and E. Bakker, *ACS Sens.*, 2016, **1**, 516-520.

## NMR spectra

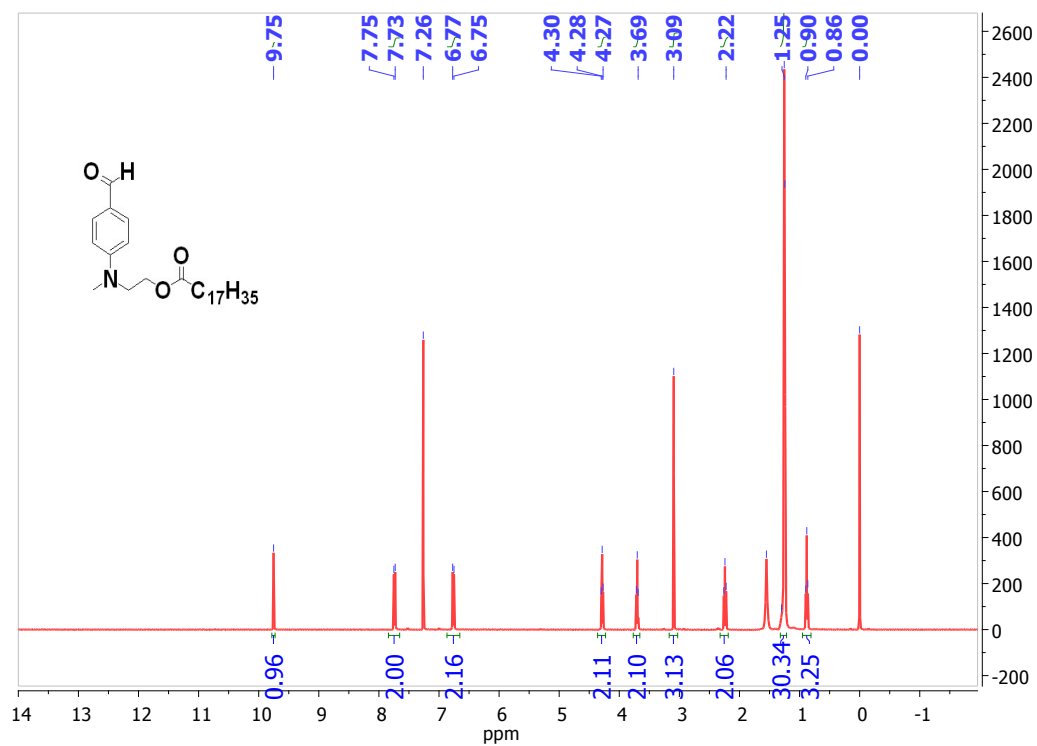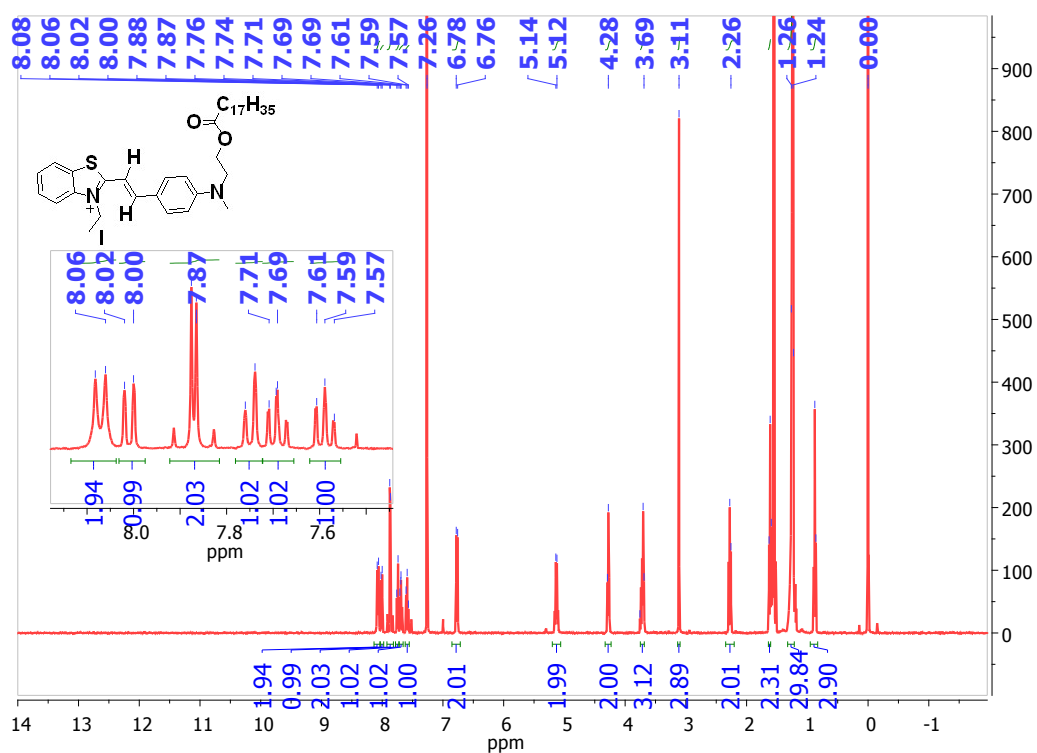

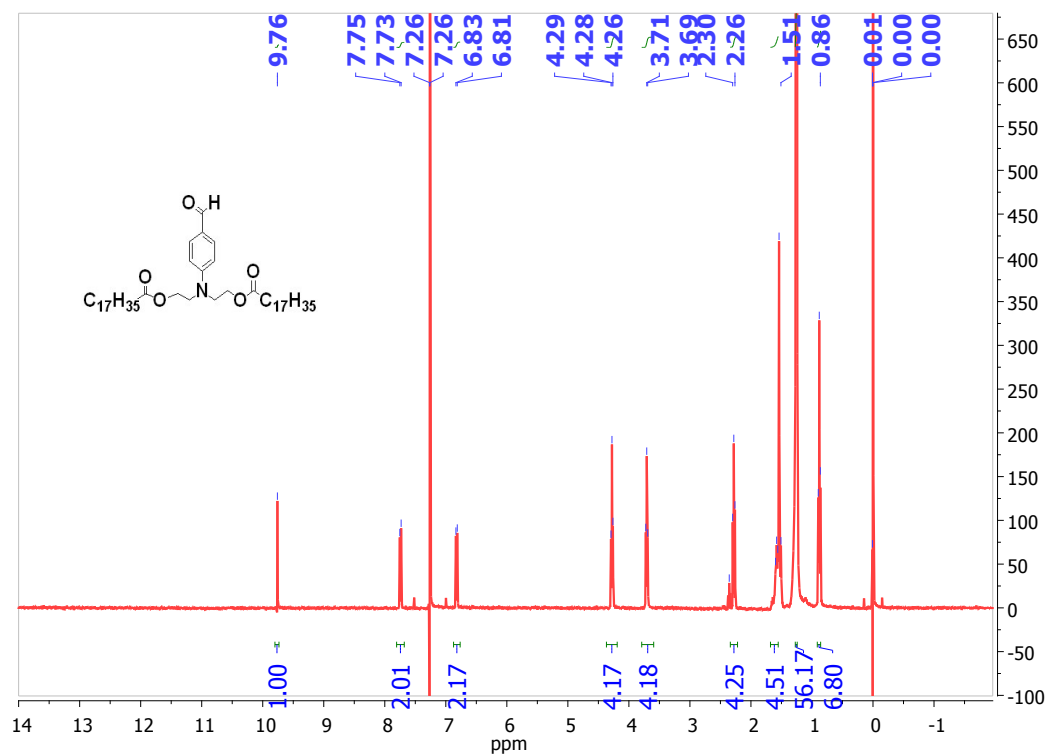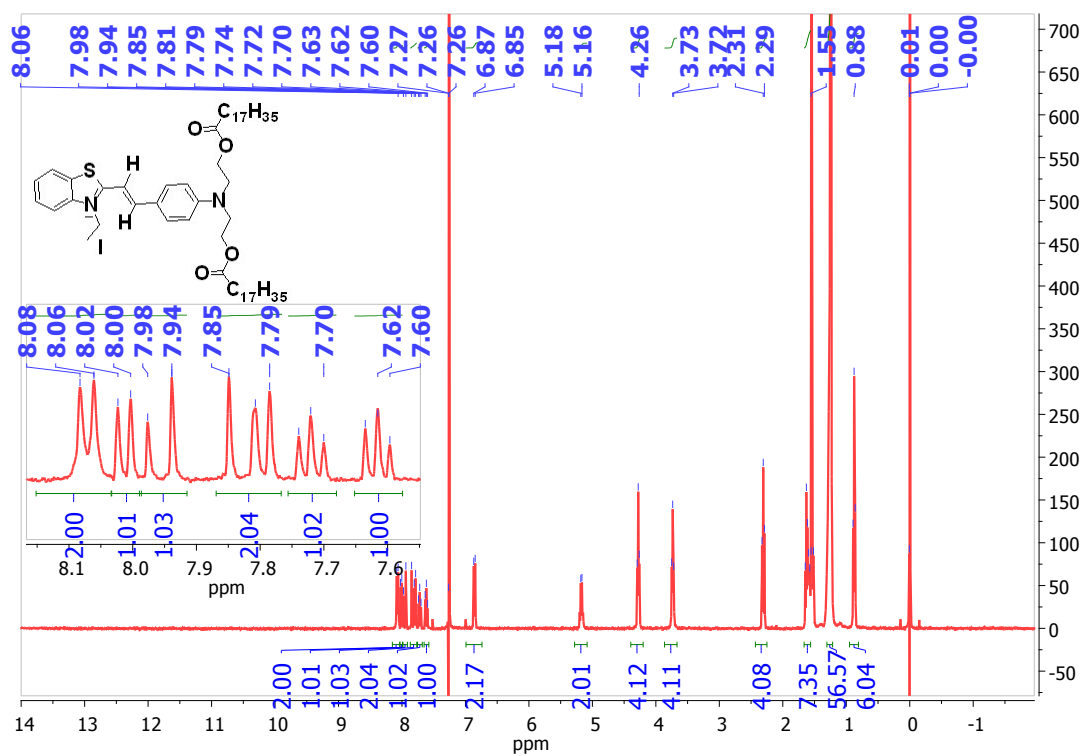

Supplement: d0ay00439a1.pdf [file d0ay00439a1.pdf]
